# Supplementary material for: Identification of the acetaldehyde oxide Criegee intermediate reaction network in the ozone-assisted low-temperature oxidation of trans-2-butene
Source: Royal Society of Chemistry journal article supplement (doi:10.1039/d1cp03126k), 2021-01-01
Supplement: d1cp03126k1.pdf [file d1cp03126k1.pdf]

## SUPPLEMENTARY INFORMATION

### **Identification of the Acetaldehyde Oxide Criegee Intermediate Reaction Network in the Ozone-Assisted Low-Temperature Oxidation of *trans*-2-Butene**

Alan R. Conrad,<sup>a</sup> Nils Hansen,<sup>b</sup> Ahren W. Jasper,<sup>c</sup> Natasha K. Thomason,<sup>a</sup> Laura Hidalgo-Rodrigues,<sup>a</sup> Sean Treshock,<sup>a</sup> and Denisia M. Popolan-Vaida<sup>a,\*</sup>

<sup>a</sup> *Department of Chemistry, University of Central Florida, Orlando, FL 32816, USA*

<sup>b</sup> *Combustion Research Facility, Sandia National Laboratories, Livermore, CA 94551, USA*

<sup>c</sup> *Chemical Sciences and Engineering Division, Argonne National Laboratory, Lemont, IL 60439, USA*

---

\* Author to whom correspondence should be addressed. E-mail: denisia.popolan-vaida@ucf.edu, Tel: 407-823-1537.

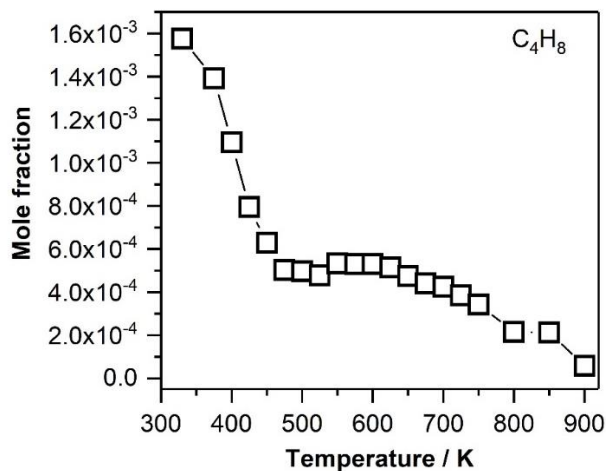

**Figure S1:** Mole fraction temperature profile of *trans*-2-butene concentration.

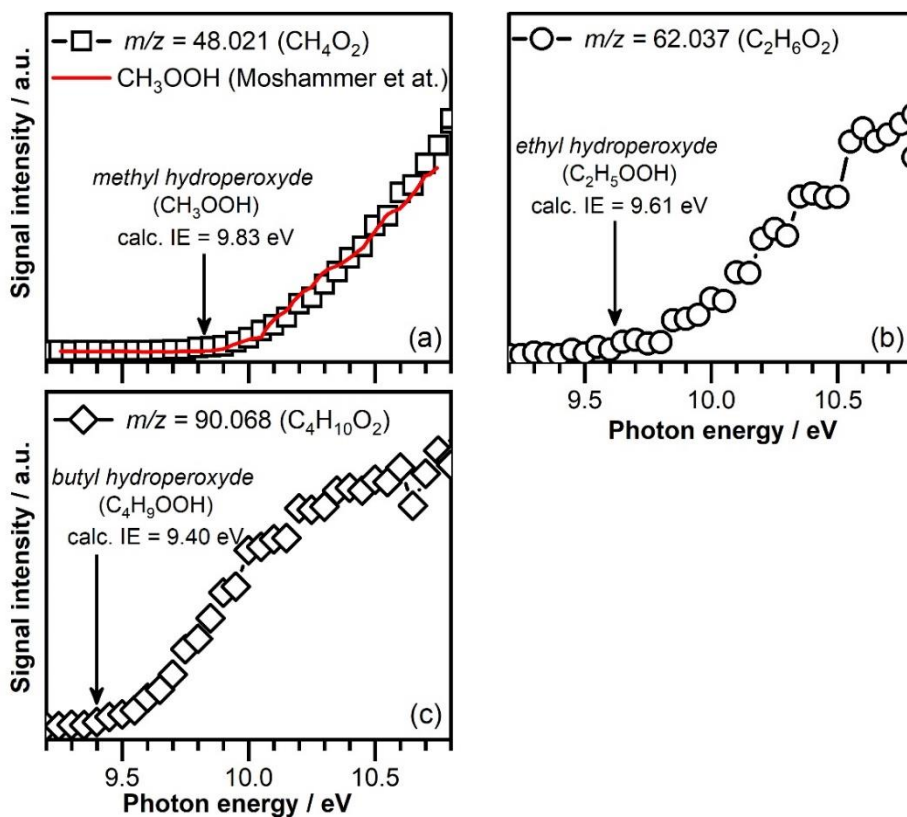

**Figure S2.** PIE scans of the signal recorded at (a)  $m/z = 48.021$  ( $\text{CH}_4\text{O}_2$ ), (b)  $m/z = 62.037$  ( $\text{C}_2\text{H}_6\text{O}_2$ ), and (c)  $m/z = 90.068$  at a temperature of 425 K. The observed ionization thresholds are close to the calculated values for  $\text{CH}_3\text{OOH}$ ,  $\text{C}_2\text{H}_5\text{OOH}$ , and  $\text{C}_4\text{H}_9\text{OOH}$ , respectively. The observed PIE curve of the  $\text{CH}_4\text{O}_2$  signal resembles the one sampled by Moshammer et al.<sup>1</sup>

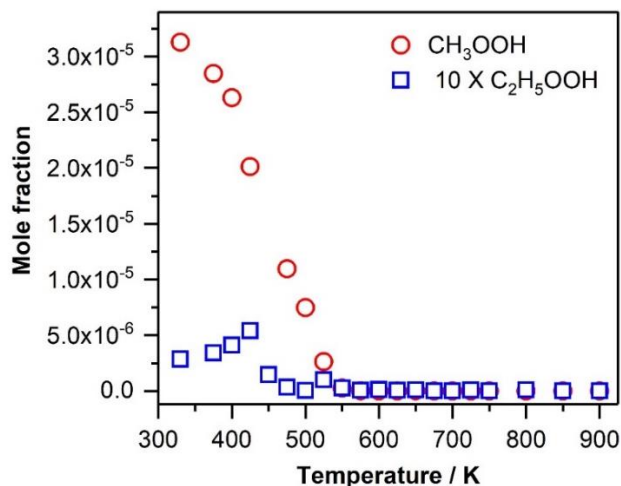

**Figure S3.** Experimentally measured mole fraction temperature profiles of (a)  $\text{CH}_3\text{OOH}$  and (b)  $\text{C}_2\text{H}_5\text{OOH}$  concentrations. The conversion of the mass spectra in mol fraction profiles is performed using a procedure described in literature,<sup>2-3</sup> using the cross section reported by Moshhammer et al.<sup>1</sup> for  $\text{CH}_3\text{OOH}$  and Rousso et al.<sup>4</sup> for  $\text{C}_2\text{H}_5\text{OOH}$ . The low-temperature oxidation region and the negative-temperature coefficient region are clearly observed.  $\text{CH}_3\text{OOH}$  and  $\text{C}_2\text{H}_5\text{OOH}$  are present only in the temperature region below 600 K.

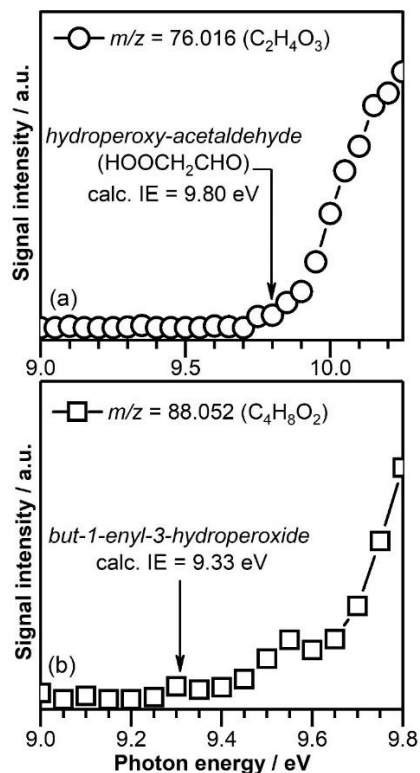

**Figure S4.** PIE scans of the signal recorded at (a)  $m/z = 76.016$  ( $\text{C}_2\text{H}_4\text{O}_3$ ) and (b)  $m/z = 88.052$  ( $\text{C}_4\text{H}_8\text{O}_2$ ) at a temperature of 425 K. The observed ionization thresholds match the calculated values for hydroperoxy-acetaldehyde<sup>4</sup> and but-1-enyl-3-hydroperoxide<sup>5</sup>.

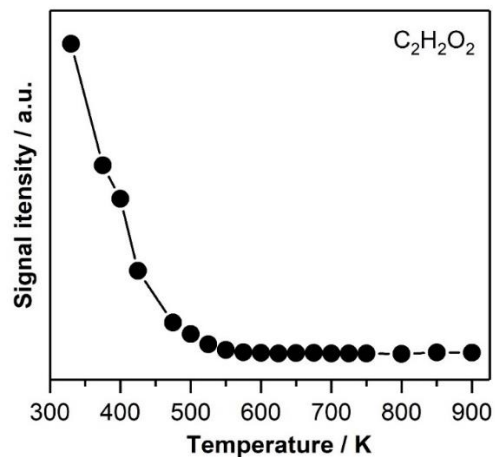

**Figure S5.** Experimentally measured glyoxal ( $C_2H_2O_2$ ,  $m/z = 58.005$ ) signal intensity as a function of temperature. The signal is recorded at a photon energy of 10.5 eV, which is slightly above the ionization energy of glyoxal.

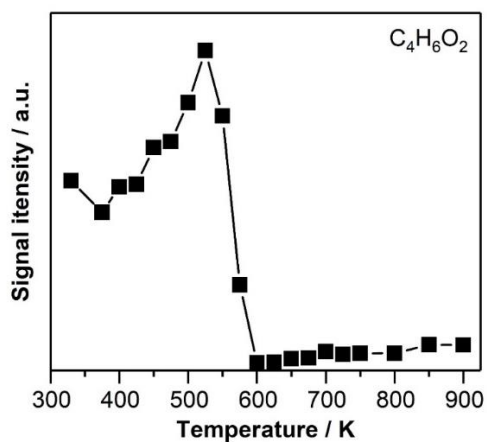

**Figure S6.** Experimentally measured diacetyl ( $C_4H_6O_2$ ,  $m/z = 86.037$ ) signal intensity as a function of temperature recorded at a photon energy of 10.0 eV.

**Table S1:** Products identified in the ozone-assisted oxidation reaction of *trans*-2-butene in three different temperature regions. The values of the ionization energies displayed in the table are either adapted from NIST Chemistry WebBook,<sup>6</sup> from literature (italicized values), or are calculated in this study (bolded values).

| M (g/mol)                                    | Compounds                                     |                                | Ionization energy (eV)     |
|----------------------------------------------|-----------------------------------------------|--------------------------------|----------------------------|
|                                              | Formula                                       | Name                           |                            |
| <b>JSR temperature &lt; 600 K</b>            |                                               |                                |                            |
| 16.031                                       | CH <sub>4</sub>                               | methane                        | 12.61                      |
| 18.010                                       | H <sub>2</sub> O                              | water                          | 12.62                      |
| 26.015                                       | C <sub>2</sub> H <sub>2</sub>                 | acetylene                      | 11.40                      |
| 27.994                                       | CO                                            | carbon monoxide                | 14.01                      |
| 30.010                                       | CH <sub>2</sub> O                             | formaldehyde                   | 10.88                      |
| 30.046                                       | C <sub>2</sub> H <sub>6</sub>                 | ethane                         | 11.52                      |
| 32.026                                       | CH <sub>4</sub> O                             | methanol                       | 10.84                      |
| 42.010                                       | C <sub>2</sub> H <sub>2</sub> O               | ketene                         | 9.61                       |
| 42.046                                       | C <sub>3</sub> H <sub>6</sub>                 | propene                        | 9.73                       |
| 43.989                                       | CO <sub>2</sub>                               | carbon dioxide                 | 13.77                      |
| 44.026                                       | C <sub>2</sub> H <sub>4</sub> O               | acetaldehyde                   | 10.22                      |
| 46.005                                       | CH <sub>2</sub> O <sub>2</sub>                | formic acid                    | 11.33                      |
| 40.021                                       | CH <sub>4</sub> O                             | methyl hydroperoxide           | 9.83 <sup>1</sup>          |
| 58.005                                       | C <sub>2</sub> H <sub>2</sub> O <sub>2</sub>  | glyoxal                        | 10.20                      |
| 60.021                                       | C <sub>2</sub> H <sub>4</sub> O <sub>2</sub>  | acetic acid<br>glycolaldehyde  | 10.65<br>9.98 <sup>4</sup> |
| 62.036                                       | C <sub>2</sub> H <sub>6</sub> O <sub>2</sub>  | ethyl hydroperoxide            | 9.61 <sup>1</sup>          |
| 66.046                                       | C <sub>5</sub> H <sub>6</sub>                 | 1,3-cyclopentadiene            | 8.57                       |
| 76.019                                       | C <sub>2</sub> H <sub>4</sub> O <sub>3</sub>  | hydroperoxyl acetaldehyde      | 9.80                       |
| 78.031                                       | C <sub>2</sub> H <sub>6</sub> O <sub>3</sub>  | hydroxyethyl hydroperoxide     | <b>9.55</b>                |
| 86.036                                       | C <sub>4</sub> H <sub>6</sub> O <sub>2</sub>  | diacetyl                       | 9.30                       |
| 88.052                                       | C <sub>4</sub> H <sub>8</sub> O <sub>2</sub>  | but-1-enyl-3-hydroperoxide     | 9.33                       |
| 90.031                                       | C <sub>3</sub> H <sub>6</sub> O <sub>3</sub>  | 3-methyl-1,2,4-trioxolane      | <b>9.41</b>                |
| 90.068                                       | C <sub>4</sub> H <sub>10</sub> O <sub>2</sub> | butyl hydroperoxide            | 9.40                       |
| 104.047                                      | C <sub>4</sub> H <sub>8</sub> O <sub>3</sub>  | 3-hydroperoxybutan-2-one       | <b>9.29</b>                |
| 116.083                                      | C <sub>6</sub> H <sub>12</sub> O <sub>2</sub> | 4-hydroxy-3-methylpentan-2-one | <b>9.32</b>                |
| <b>600 K &lt; JSR temperature &lt; 800 K</b> |                                               |                                |                            |
| 42.046                                       | C <sub>3</sub> H <sub>6</sub>                 | propene                        | 9.73                       |
| 54.046                                       | C <sub>4</sub> H <sub>6</sub>                 | 1,3-butadiene                  | 9.07                       |
| 70.041                                       | C <sub>4</sub> H <sub>6</sub> O               | 2-butenal                      | 9.75                       |
| 86.036                                       | C <sub>4</sub> H <sub>6</sub> O <sub>2</sub>  | diacetyl                       | 9.30                       |
| <b>JSR temperature &gt; 800 K</b>            |                                               |                                |                            |
| 16.031                                       | CH <sub>4</sub>                               | methane                        | 12.61                      |
| 18.010                                       | H <sub>2</sub> O                              | water                          | 12.62                      |
| 26.015                                       | C <sub>2</sub> H <sub>2</sub>                 | acetylene                      | 11.40                      |
| 27.994                                       | CO                                            | carbon monoxide                | 14.01                      |
| 28.031                                       | C <sub>2</sub> H <sub>4</sub>                 | ethylene                       | 10.51                      |
| 30.010                                       | CH <sub>2</sub> O                             | formaldehyde                   | 10.88                      |
| 30.046                                       | C <sub>2</sub> H <sub>6</sub>                 | ethane                         | 11.52                      |
| 40.031                                       | C <sub>3</sub> H <sub>4</sub>                 | allene<br>propyne              | 9.69<br>10.36              |

|        |                               |                     |       |
|--------|-------------------------------|---------------------|-------|
| 42.046 | C <sub>3</sub> H <sub>6</sub> | propene             | 9.73  |
| 43.989 | CO <sub>2</sub>               | carbon dioxide      | 13.77 |
| 54.046 | C <sub>4</sub> H <sub>6</sub> | 1,3-butadiene       | 9.07  |
| 66.046 | C <sub>5</sub> H <sub>6</sub> | 1,3-cyclopentadiene | 8.57  |

## References

1. Moshhammer, K.; Jasper, A. W.; Popolan-Vaida, D. M.; Lucassen, A.; Diévert, P.; Selim, H.; Eskola, A. J.; Taatjes, C. A.; Leone, S. R.; Sarathy, S. M.; Ju, Y.; Dagaut, P.; Kohse-Höinghaus, K.; Hansen, N., Detection and Identification of the Keto-Hydroperoxide (HOOCH<sub>2</sub>OCHO) and Other Intermediates during Low-Temperature Oxidation of Dimethyl Ether. *J. Phys. Chem. A* **2015**, *119*, 7361-7374.
2. Schenk, M.; Leon, L.; Moshhammer, K.; Oßwald, P.; Zeuch, T.; Seidel, L.; Mauss, F.; Kohse-Höinghaus, K., Detailed mass spectrometric and modeling study of isomeric butene flames. *Combust. Flame* **2013**, *160*, 487-503.
3. Egolfopoulos, F. N.; Hansen, N.; Ju, Y.; Kohse-Höinghaus, K.; Law, C. K.; Qi, F., Advances and challenges in laminar flame experiments and implications for combustion chemistry. *Prog. Energy Combust. Sci.* **2014**, *43*, 36-67.
4. Rousso, A. C.; Hansen, N.; Jasper, A. W.; Ju, Y., Low-temperature oxidation of ethylene by ozone in a jet-stirred reactor. *J. Phys. Chem. A* **2018**, *122*, 8674-8685.
5. Bourgalais, J.; Gouid, Z.; Herbinet, O.; Garcia, G. A.; Arnoux, P.; Wang, Z.; Tran, L.-S.; Vanhove, G.; Hochlaf, M.; Nahon, L.; Battin-Leclerc, F., Isomer-sensitive characterization of low temperature oxidation reaction products by coupling a jet-stirred reactor to an electron/ion coincidence spectrometer: case of n-pentane. *Phys. Chem. Chem. Phys.* **2020**, *22*, 1222-1241.
6. NIST Chemistry WebBook, NIST Standard Reference Database Number 69, Eds. P.J. Linstrom and W.G. Mallard, National Institute of Standards and Technology, Gaithersburg MD, 20899, <https://doi.org/10.18434/T4D303>
